# Supplementary material for: Using symptom-based case predictions to identify host genetic factors that contribute to COVID-19 susceptibility
Source: PLOS journal article supplement (doi:10.1371/journal.pone.0255402), 2021-08-11

# Quantile–quantile plots indicate no major inflation of a viral infection signal in COVID–19 GWASs

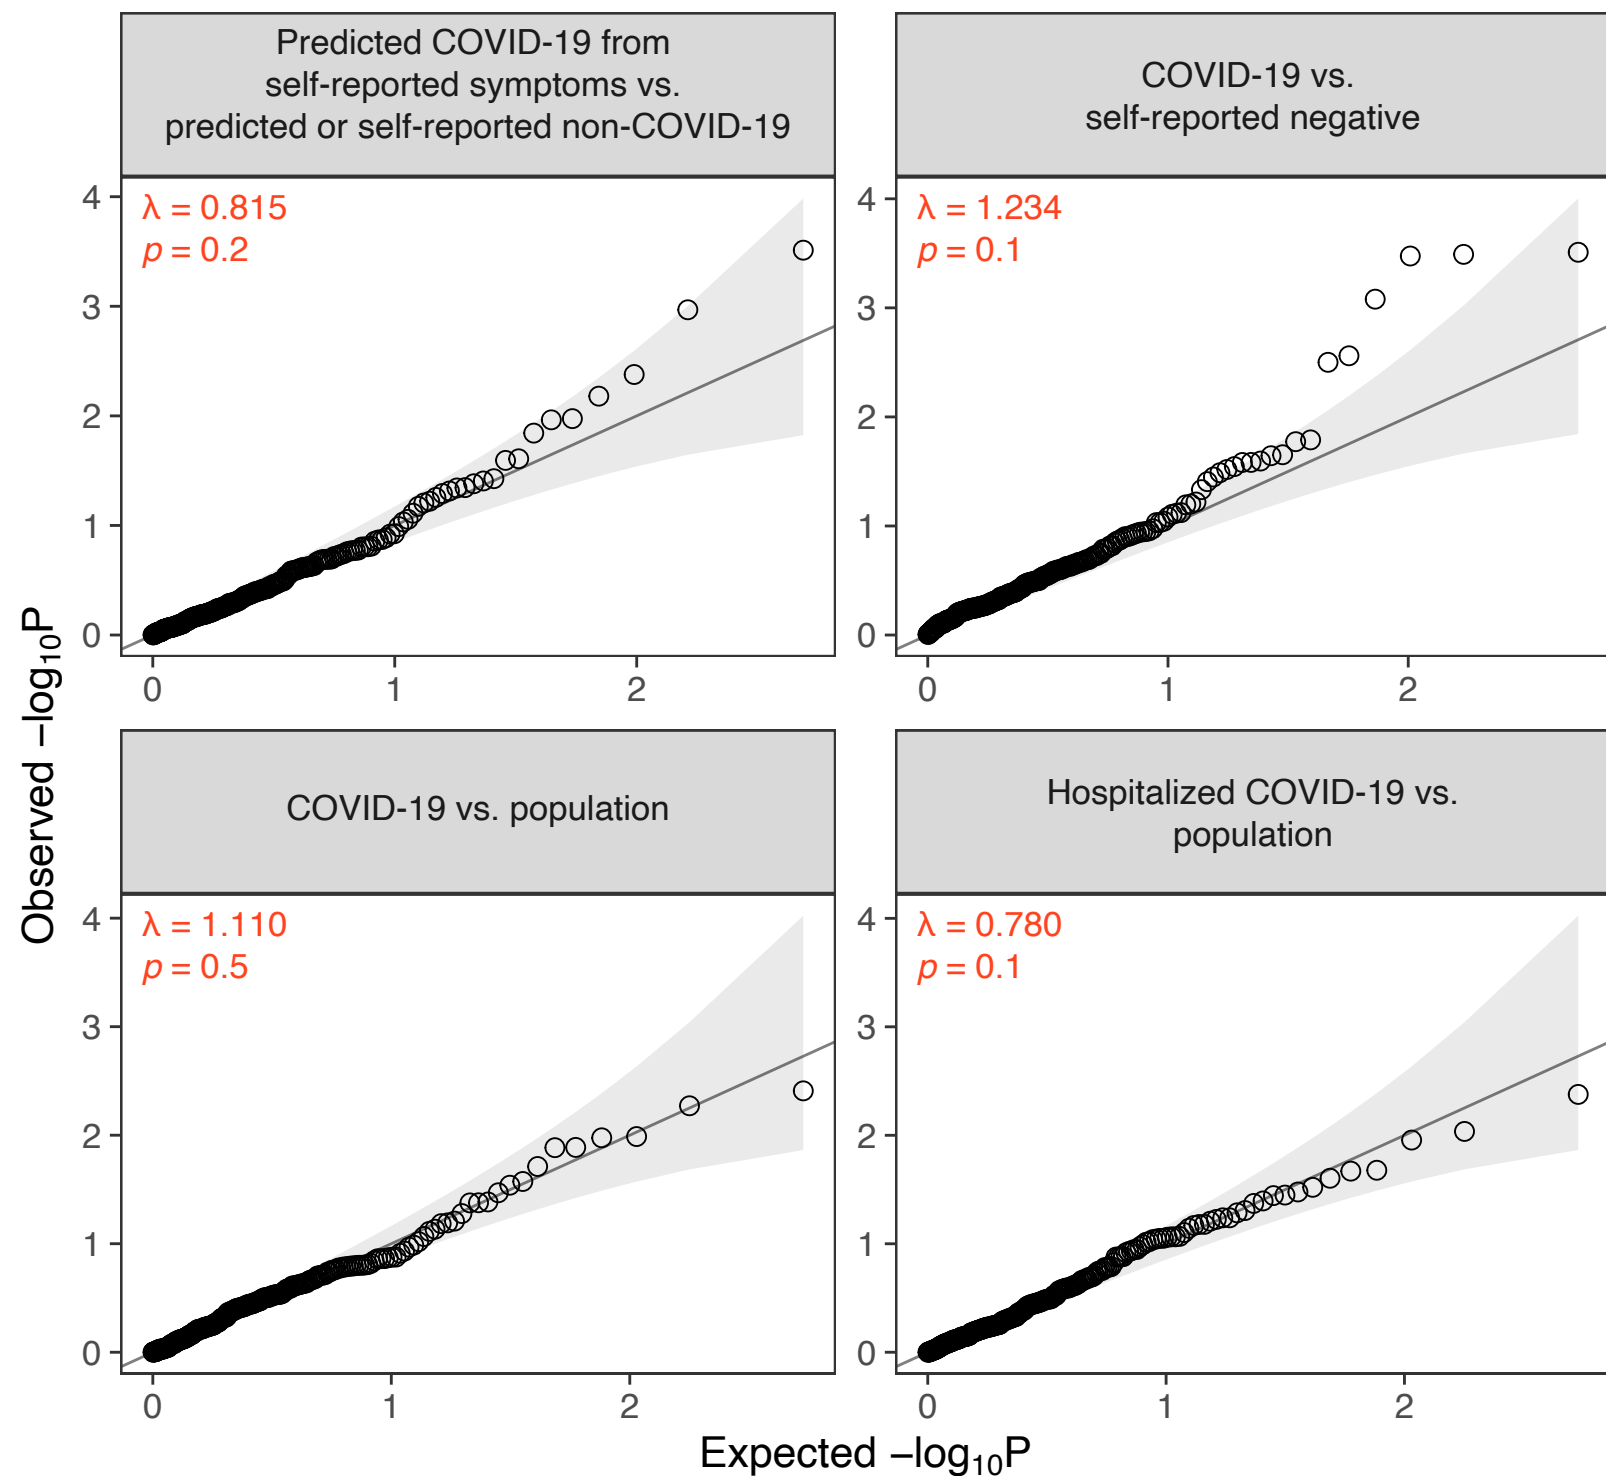

Supplement: S3 (10.1371/journal.pone.0255402.s003) [file journal.pone.0255402.s003]
